# Supplementary material for: The synthesis of novel core-substituted naphthalene diimides via Suzuki cross-coupling and their properties
Source: Royal Society of Chemistry journal article supplement (doi:10.1039/b9nj00476a), 2009-01-01
Supplement: b9nj00476a.pdf [file b9nj00476a.pdf]

## Supporting Information

### The Synthesis of Novel Core-Substituted Naphthalene Diimides *via* Suzuki Cross-Coupling and their Properties

Sheshanath V. Bhosale,<sup>\*,a</sup> Mohan B. Kalyankar,<sup>b</sup> Sidhanath V. Bhosale,<sup>b</sup> and Steven. J. Langford,<sup>\*,a</sup> Ellen F. Reid,<sup>c</sup> Conor F. Hogan.<sup>c</sup>

<sup>a</sup> School of Chemistry, Monash University, Clayton Vic-3800, Australia.

<sup>b</sup> Department of Organic Chemistry, North Maharashtra University, Jalgaon-425 001, India,

<sup>c</sup> Department of Chemistry, La Trobe University, VIC 3086.

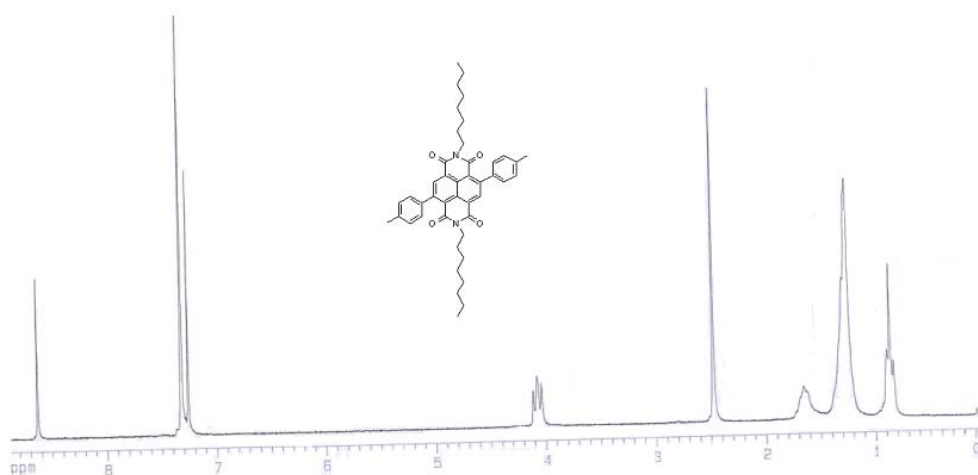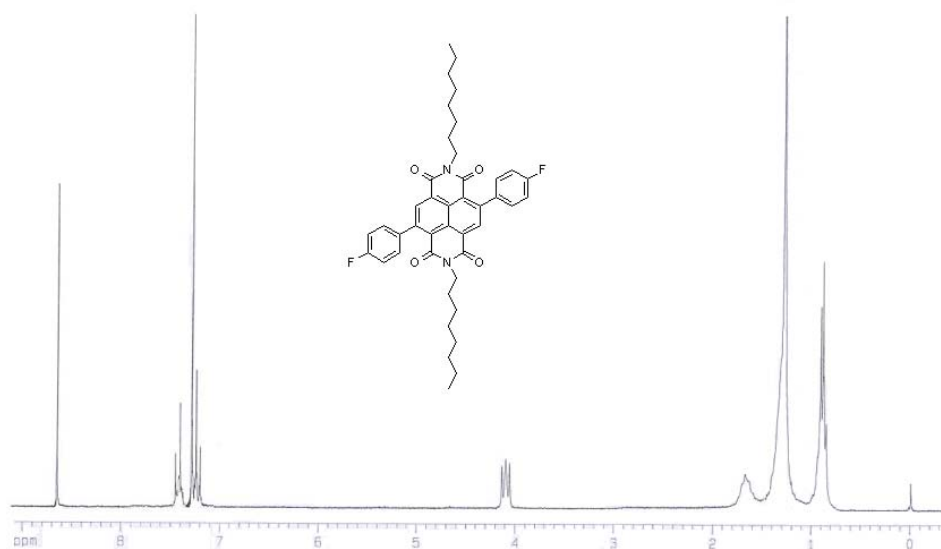

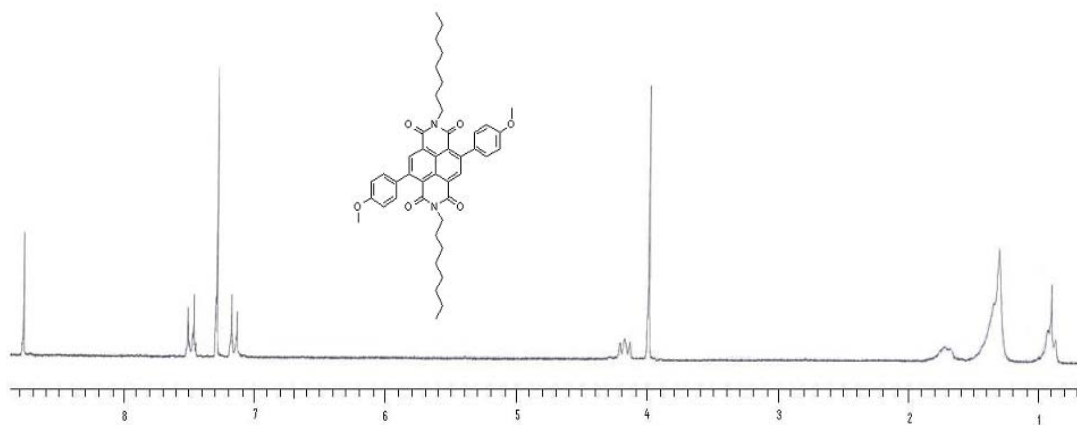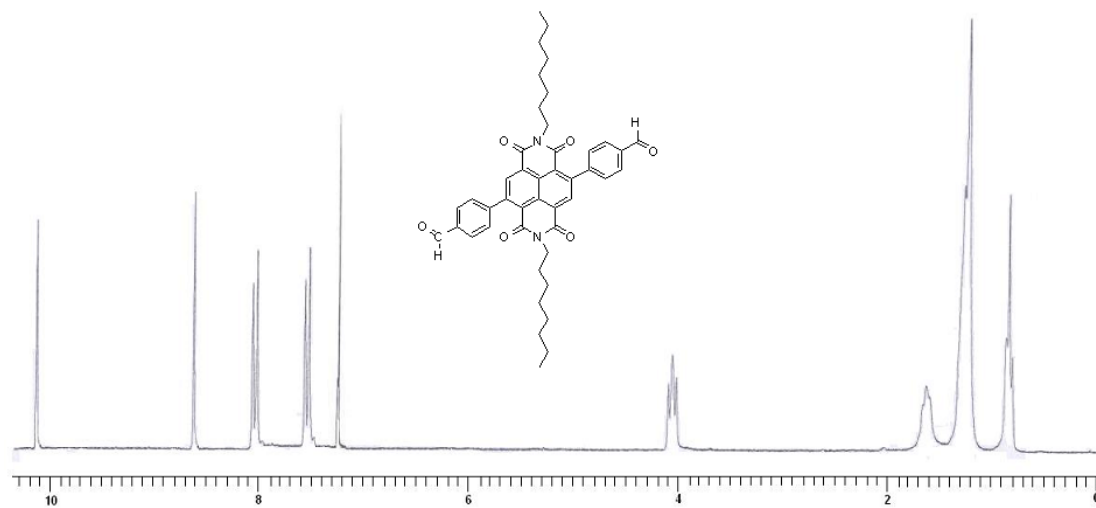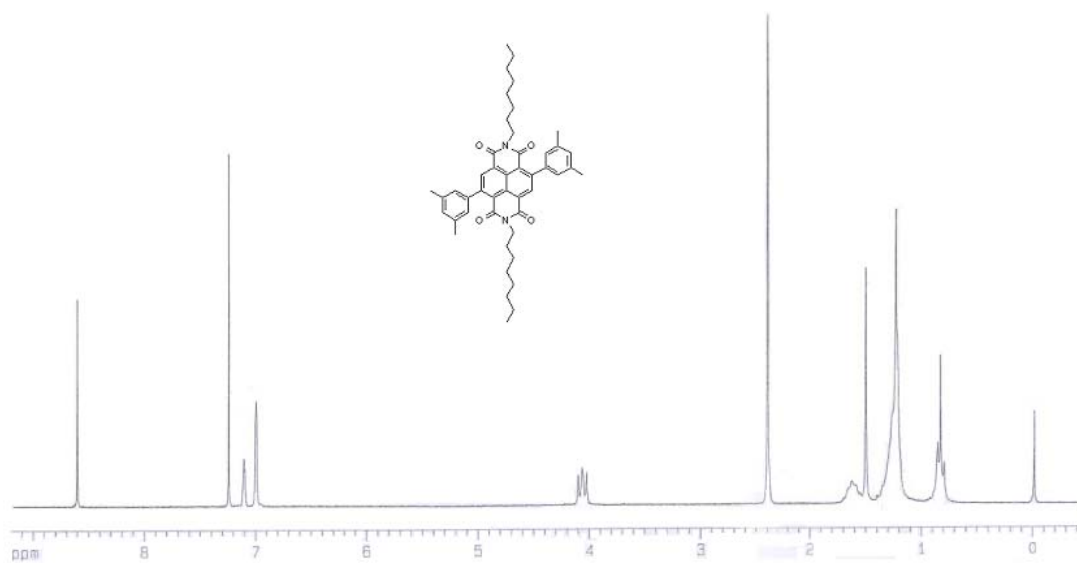

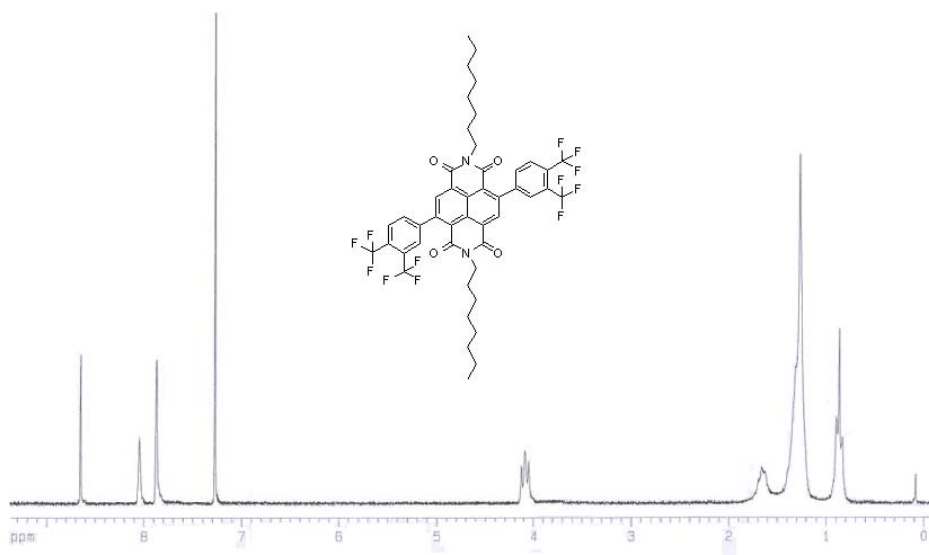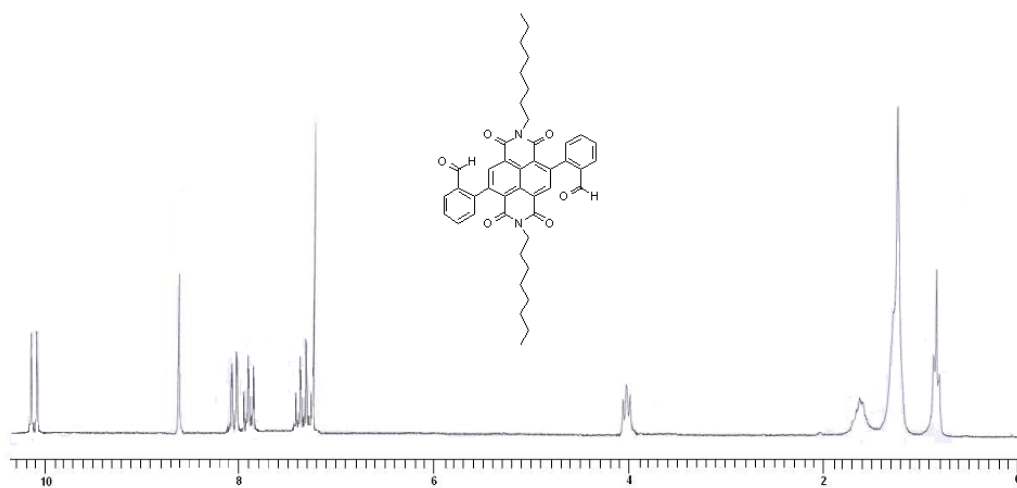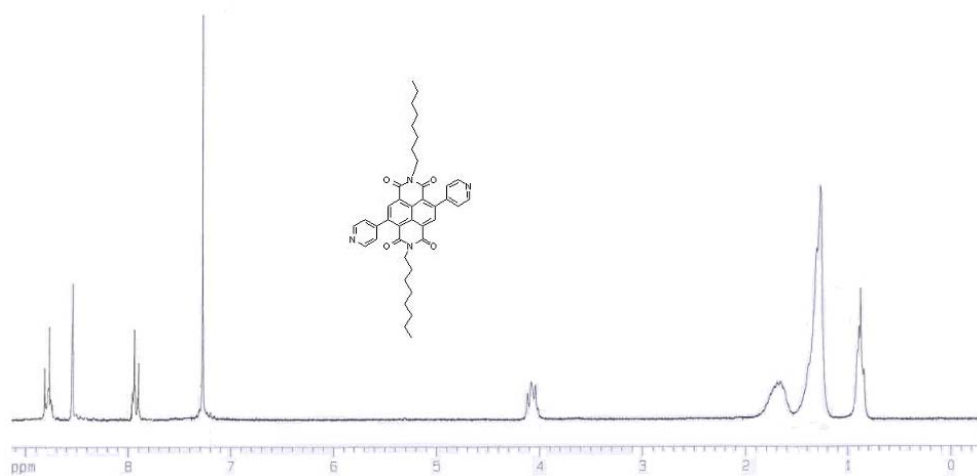

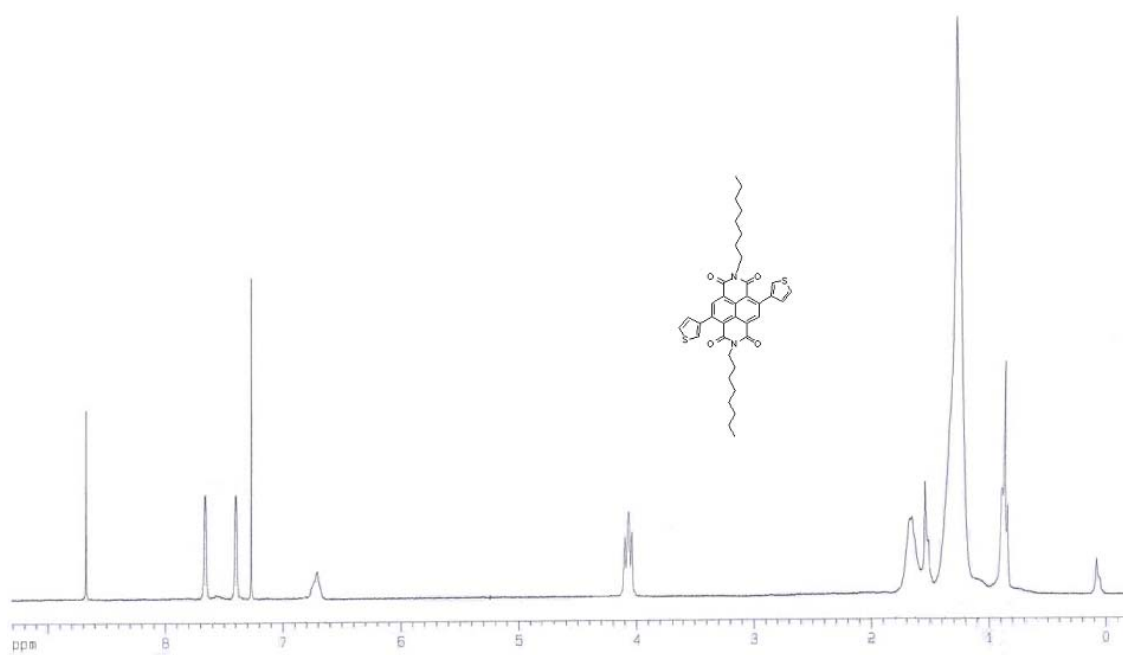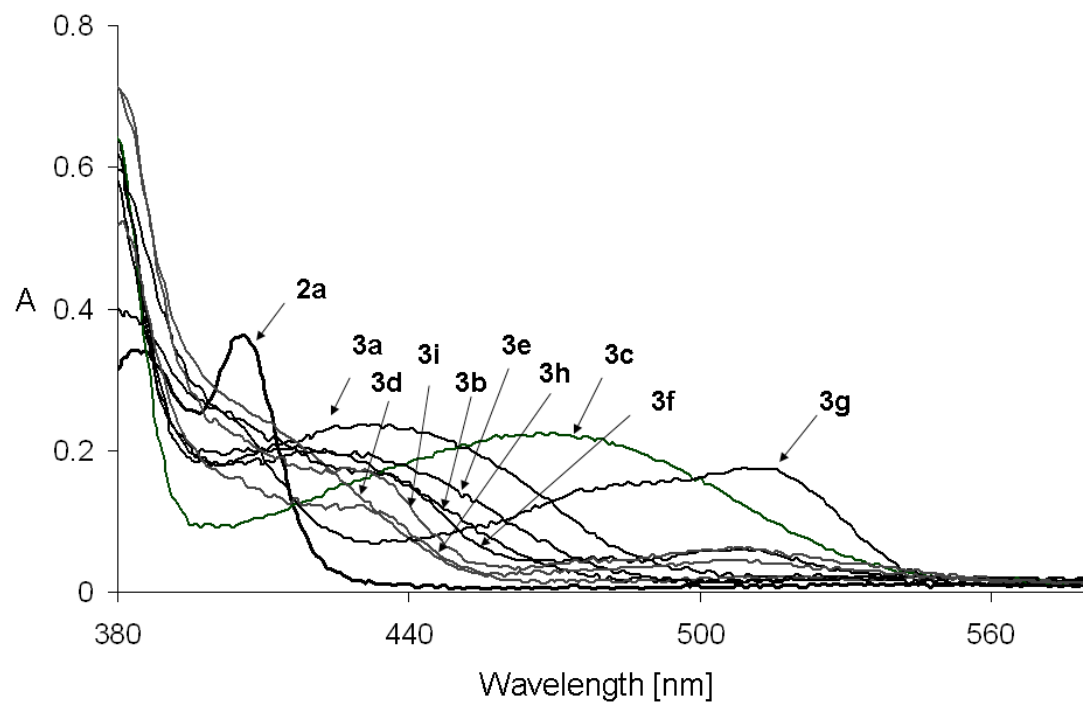

Absorption spectra of all compounds
